# Supplementary material for: Removal of calcium from water by zeolites with gravity-driven membrane filtration for water treatment without electricity
Source: Royal Society of Chemistry journal article supplement (doi:10.1039/d4ew00438h), 2024-01-01
Supplement: d4ew00438h1.pdf [file d4ew00438h1.pdf]

1

## Supplementary Information

2 **Removal of calcium from water by zeolites with gravity-driven membrane**

3 **filtration for water treatment without electricity**

4

5 Dowon Chae,<sup>a</sup> Kwang Pyo Son,<sup>a</sup> Seung Mo Kang,<sup>a</sup> Joowan Lim,<sup>a</sup> Hosung Lee,<sup>a</sup> Jin Lee,<sup>b</sup>

6 Seungjin Lee,<sup>c</sup> and Pyung-Kyu Park<sup>a,\*</sup>

7

8 <sup>a</sup> Department of Environmental and Energy Engineering, Yonsei University, 1 Yonseidae-gil,

9 Wonju, Gangwon-do 26493, Republic of Korea.

10 <sup>b</sup> Amogreentech Co., Ltd., 91 Gimpo-daero, Tongjin-eup, Gimpo, Gyeonggi-do 10014,

11 Republic of Korea.

12 <sup>c</sup> Department of Chemistry, Georgia Gwinnett College, Lawrenceville, GA 30043, U.S.A.

13

14

15

16 \*Corresponding author: Pyung-Kyu Park

17 Tel.: +82-33-760-2890; E-mail: [pkpark@yonsei.ac.kr](mailto:pkpark@yonsei.ac.kr)

18

19

20 **Table S1. Water quality of samples taken from a lake\***

---

|                                           |              |
|-------------------------------------------|--------------|
| <b>pH</b>                                 | 7.2 ~7.8     |
| <b>Turbidity [NTU]</b>                    | 1.74 ~1.82   |
| <b>TOC [mg/L]</b>                         | 2.64 ~3.36   |
| <b>UV<sub>254</sub> [cm<sup>-1</sup>]</b> | 0.021 ~0.027 |
| <b>Ca Concentration [mg/L]</b>            | 8.61 ~12.72  |

---

21 \*Maeji Lake, Wonju, Republic of Korea

22

23 **Table S2. Debris size of B and G zeolites**

|                                            | <b>Zeolite type</b> |                     |
|--------------------------------------------|---------------------|---------------------|
|                                            | <b>B</b>            | <b>G</b>            |
| <b>Diameter [<math>\mu\text{m}</math>]</b> | 1.91 ( $\pm 0.09$ ) | 7.30 ( $\pm 0.38$ ) |

24 \*The size of zeolite debris was measured by a particle size analyzer.

25

26 **Table S3. Cake (including zeolites) mass accumulated on the membrane surface during**

27 **GDM filtration (n = 3)**

|                          | <b>Zeolite type</b> |                    |                                 |                   |
|--------------------------|---------------------|--------------------|---------------------------------|-------------------|
|                          | <b>P1</b>           | <b>P2</b>          | <b>B</b>                        | <b>G</b>          |
| <b>Cake mass<br/>[g]</b> | 9.928<br>(±0.361)   | 12.367<br>(±0.554) | 0.006<br>(±0.000 <sub>1</sub> ) | 0.228<br>(±0.011) |

28

29 **Table S4. SEM-EDS calcium mass percentages of zeolites before and after the adsorption**  
30 **process**

| <b>Zeolite</b> | <b>Mass percent of calcium [%]</b>   |                                     |
|----------------|--------------------------------------|-------------------------------------|
|                | <b>Before<br/>adsorption process</b> | <b>After<br/>adsorption process</b> |
| <b>P1</b>      | 0.00                                 | 1.92                                |
| <b>P2</b>      | 1.14                                 | 1.87                                |
| <b>B</b>       | 0.00                                 | 4.13                                |
| <b>G</b>       | 0.86                                 | 1.80                                |

32 **Table S5. Parameters used for evaluation of zeolites and the range corresponding to each**  
 33 **score for the parameters**

| Score | Parameter (x)    |                              |                  |
|-------|------------------|------------------------------|------------------|
|       | Ca removal [%]   | GDM water average Flux [LMH] | price [\$/kg]    |
| ++    | $x \geq 99$      | $x \geq 300$                 | $x < 10$         |
| +     | $70 \leq x < 99$ | $150 \leq x < 300$           | $10 \leq x < 40$ |
| ±     | $40 \leq x < 70$ | $100 \leq x < 150$           | $40 \leq x < 70$ |
| –     | $x < 40$         | $x < 100$                    | $x \geq 70$      |

34 \* “–”, “±”, “+”, and “++” represent “Poor”, “Fair”, “Good”, and “Very Good”, respectively.

36 **Table S6. Price of zeolites**

---

| <b>Zeolite</b> | <b>Price [\$/kg]</b> |
|----------------|----------------------|
| <b>P1</b>      | 94.19                |
| <b>P2</b>      | 2.37                 |
| <b>B</b>       | 86.61                |
| <b>G</b>       | 3.38                 |

---

37

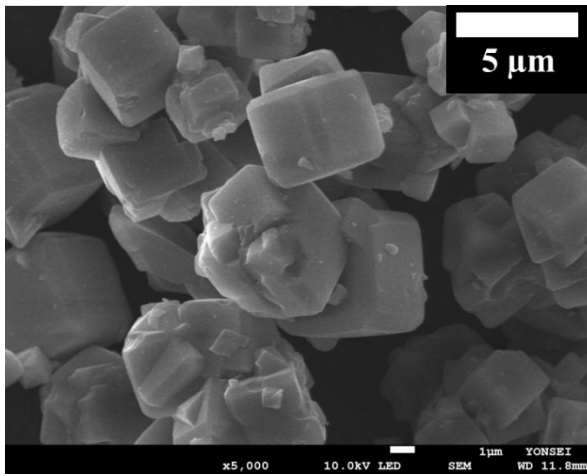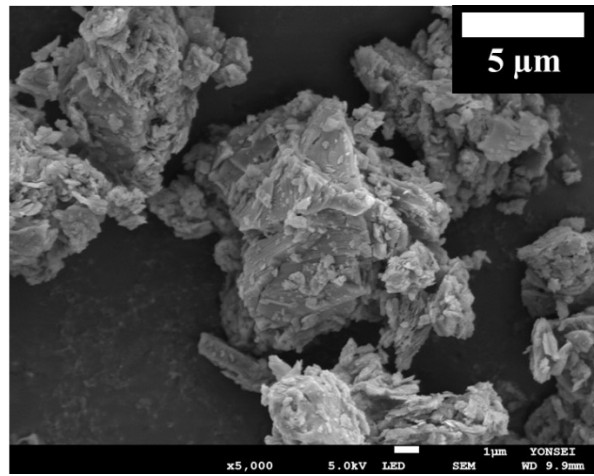

39

40

(a)

(b)

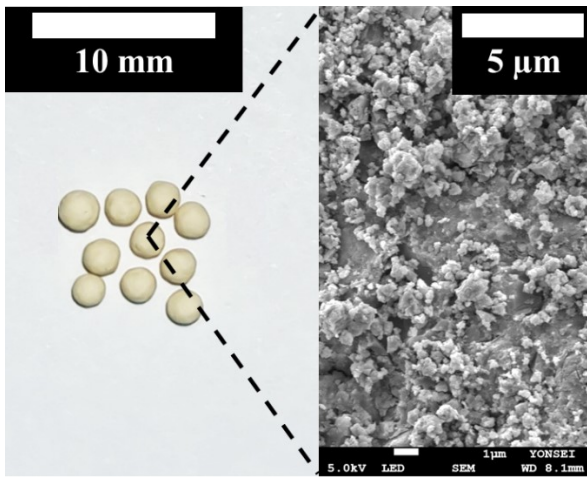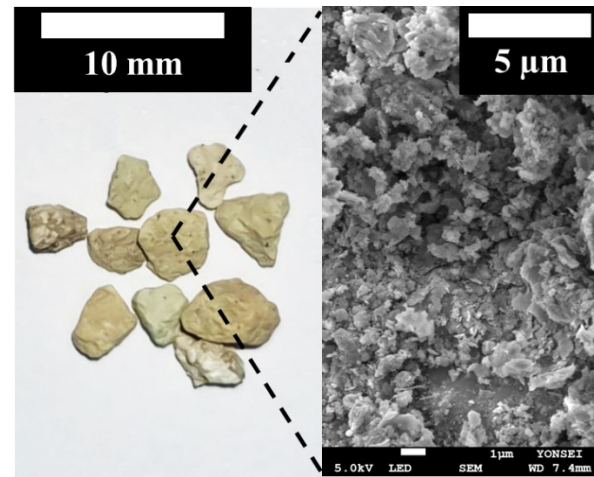

41

42

(c)

(d)

43 **Figure S1. SEM images of zeolites (a) P1, (b) P2, (c) B, and (d) G.**

44



45

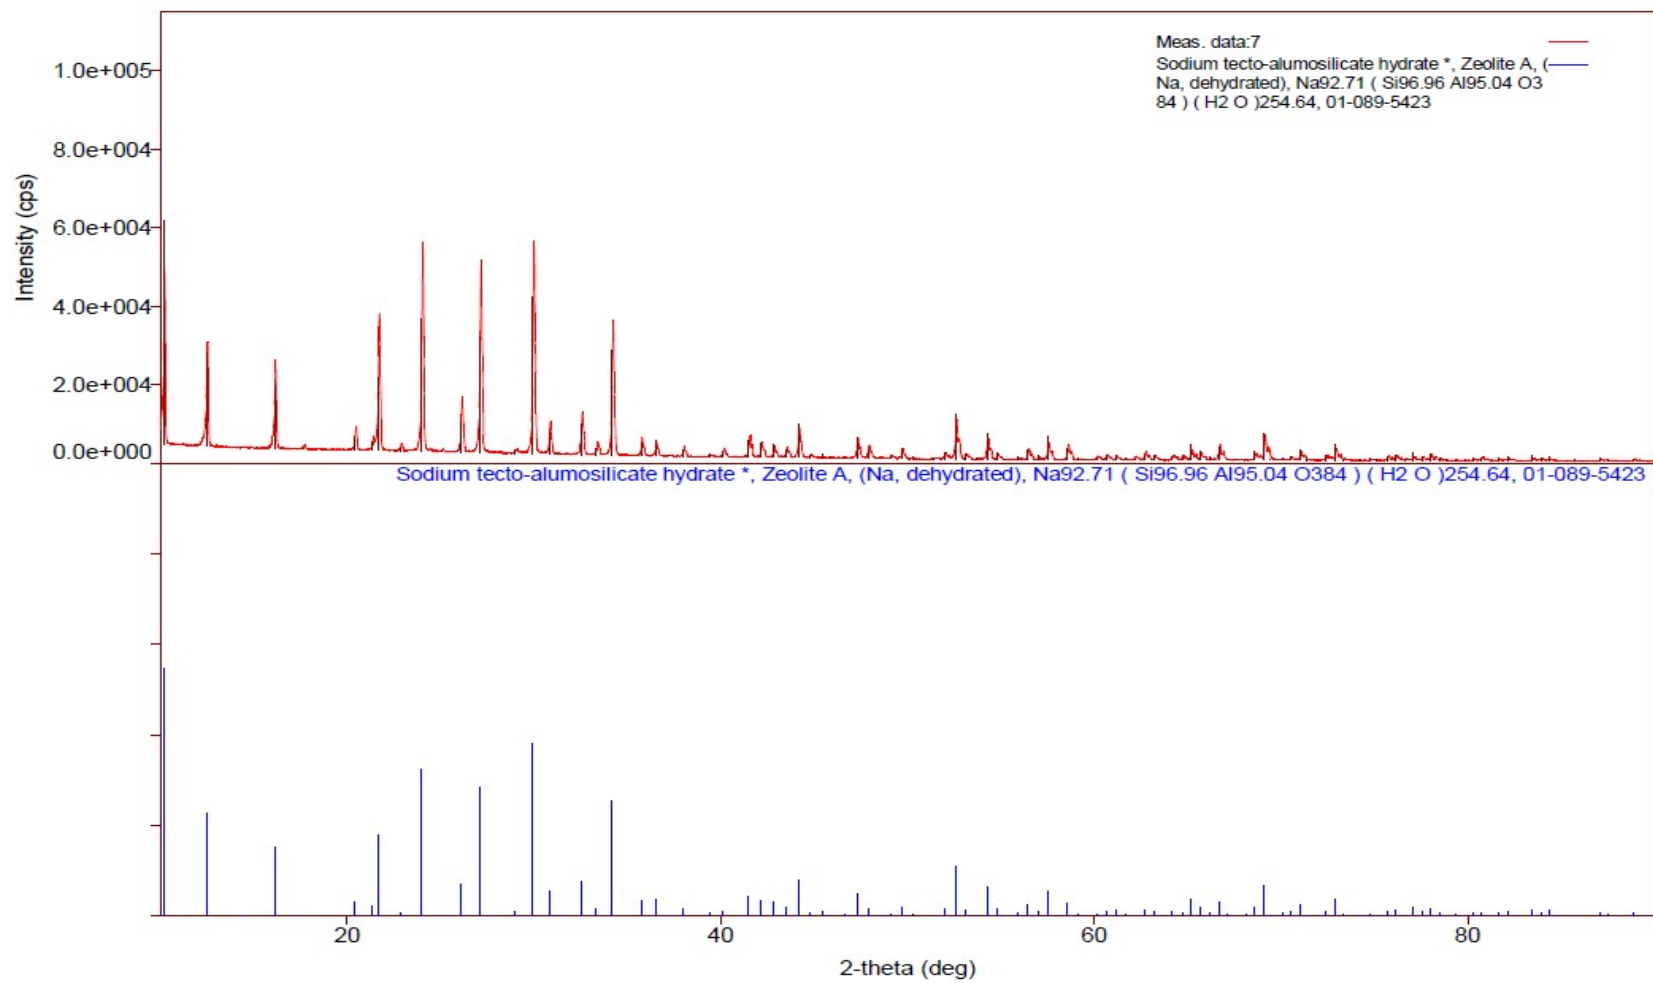

46

47

(a)

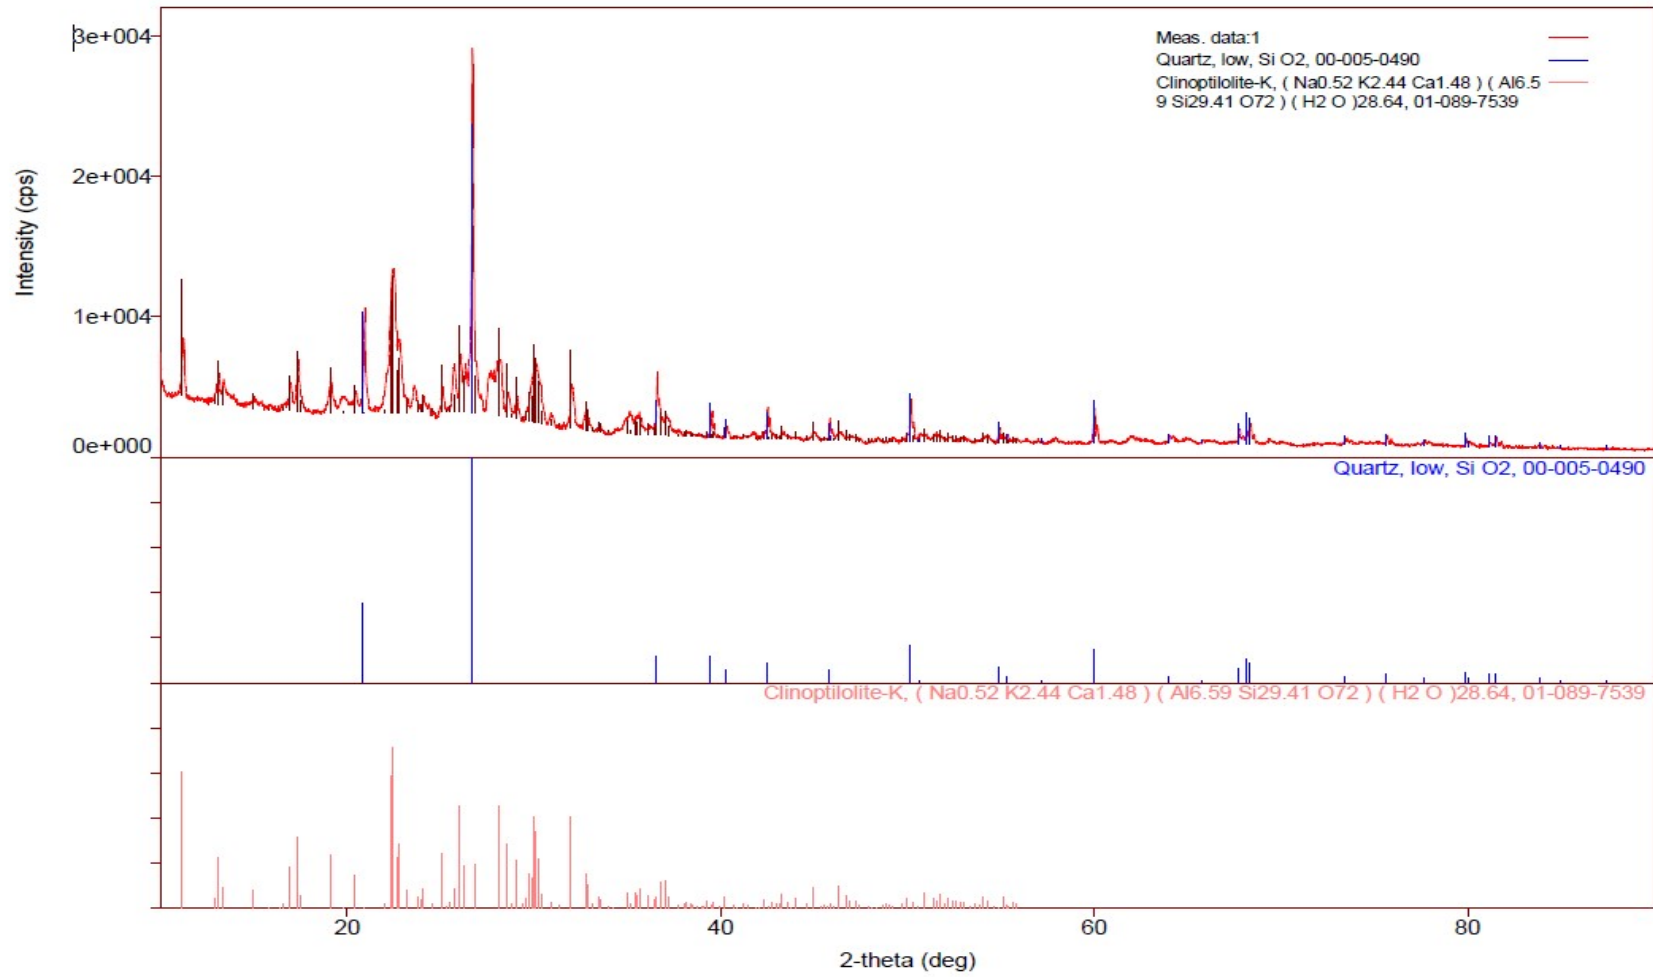

48

49

(b)

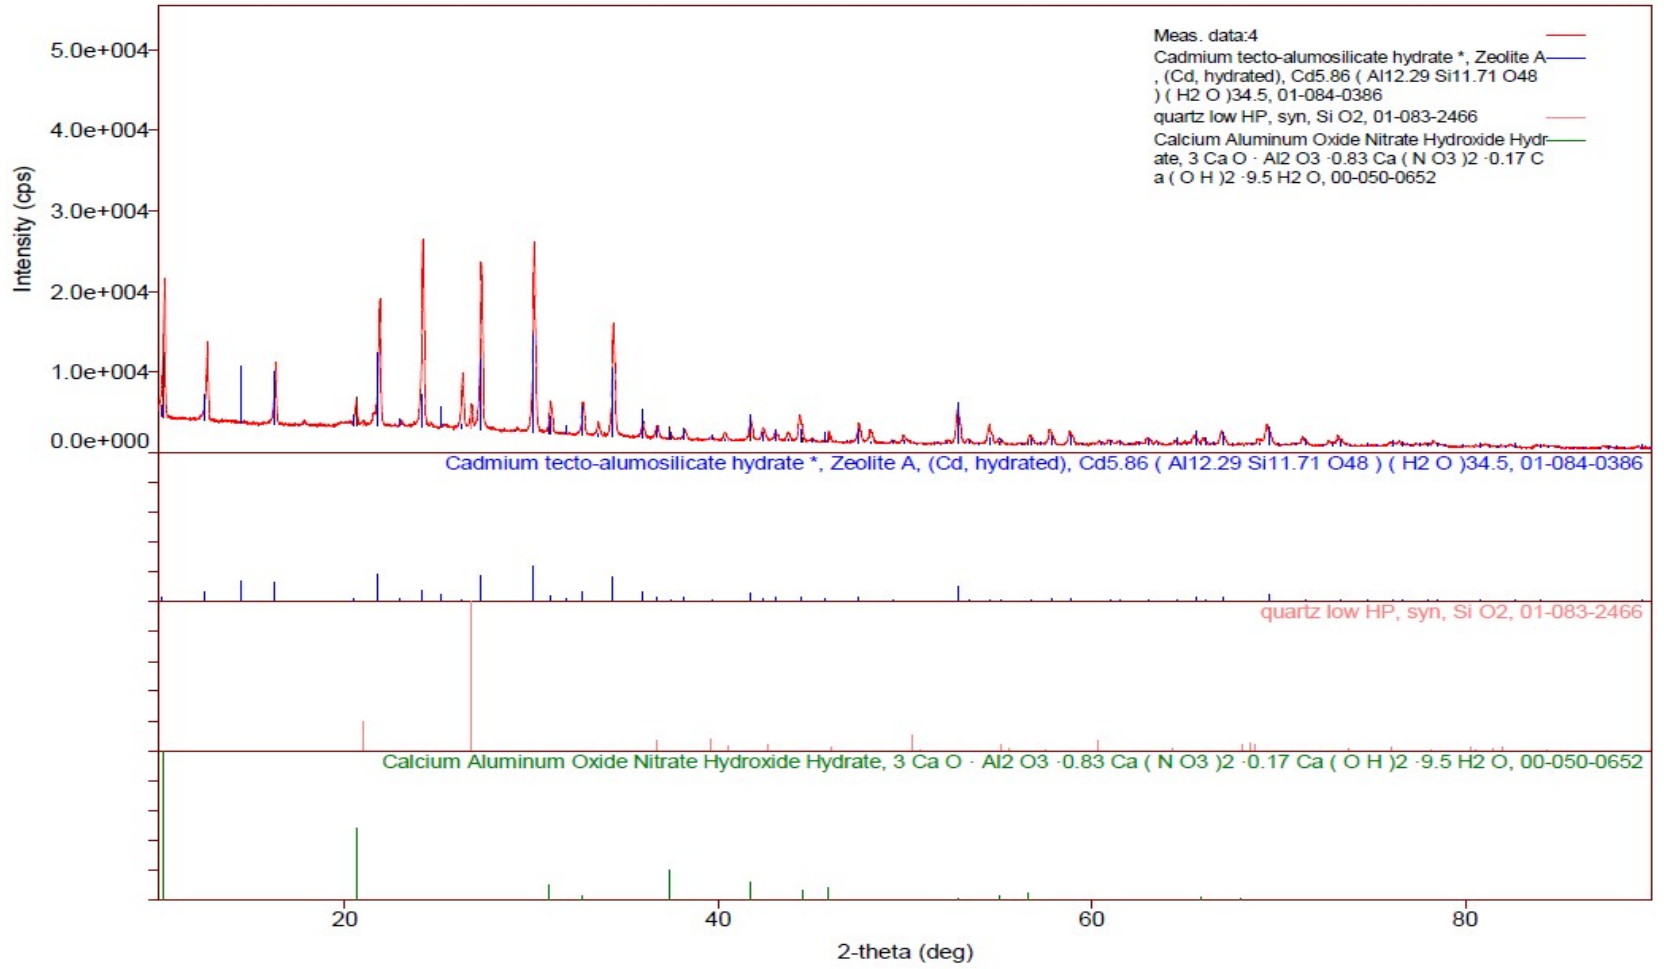

50

51

(c)

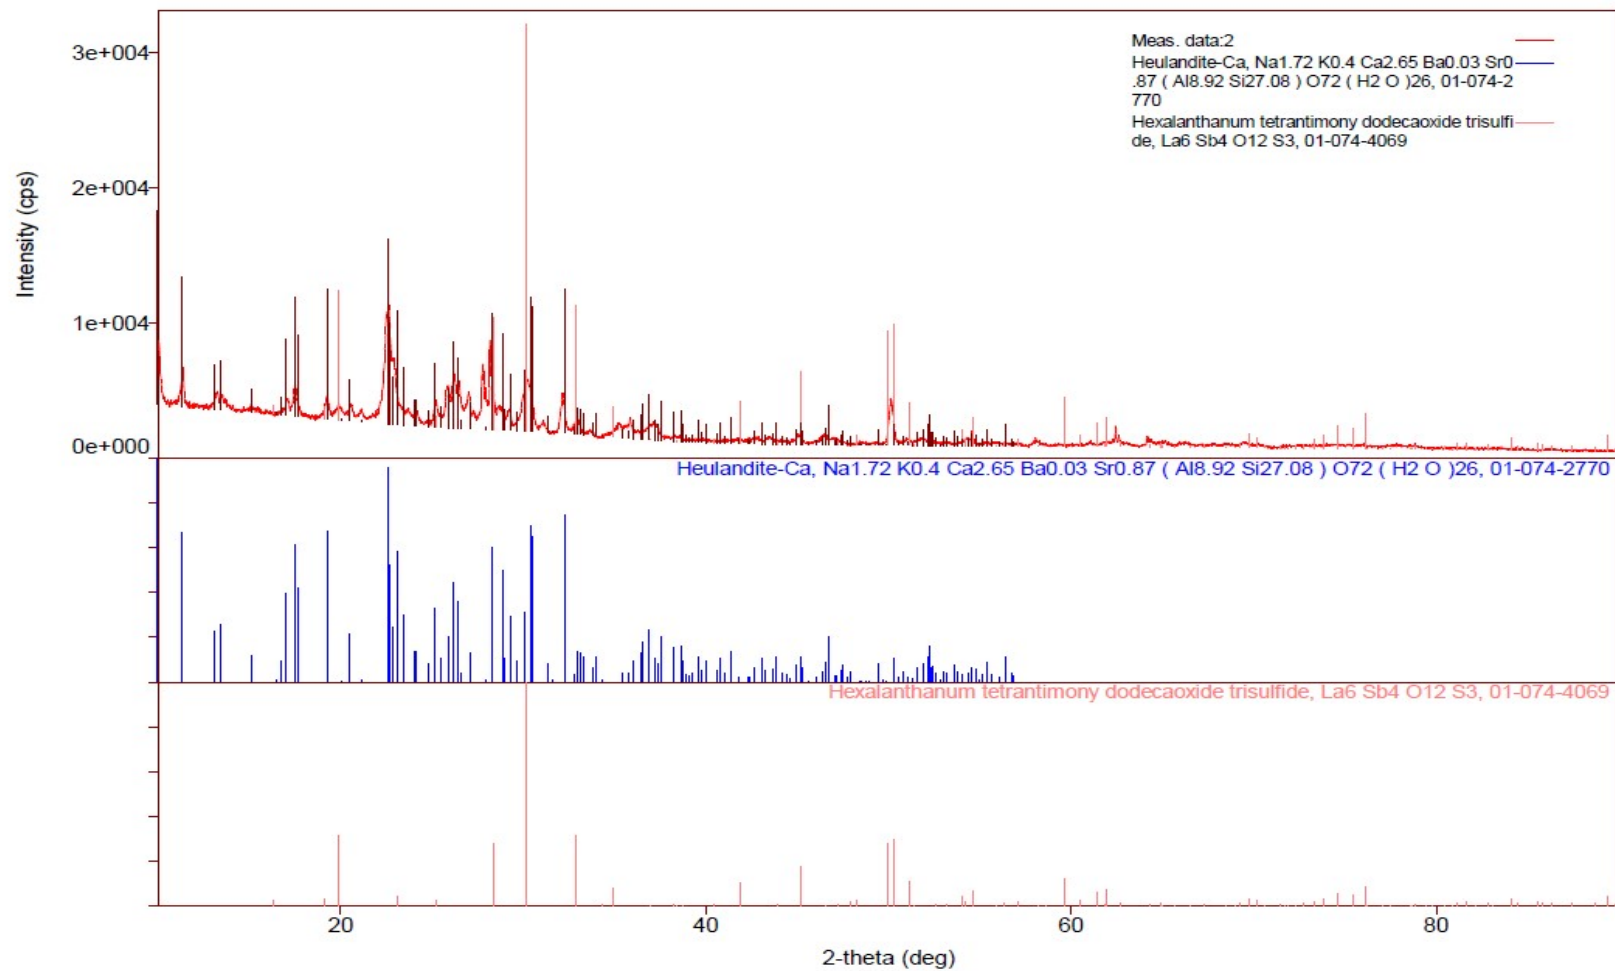

52

53

54

(d)

Figure S2. XRD pattern of zeolites (a) P1, (b) P2, (c) B, and (d) G.

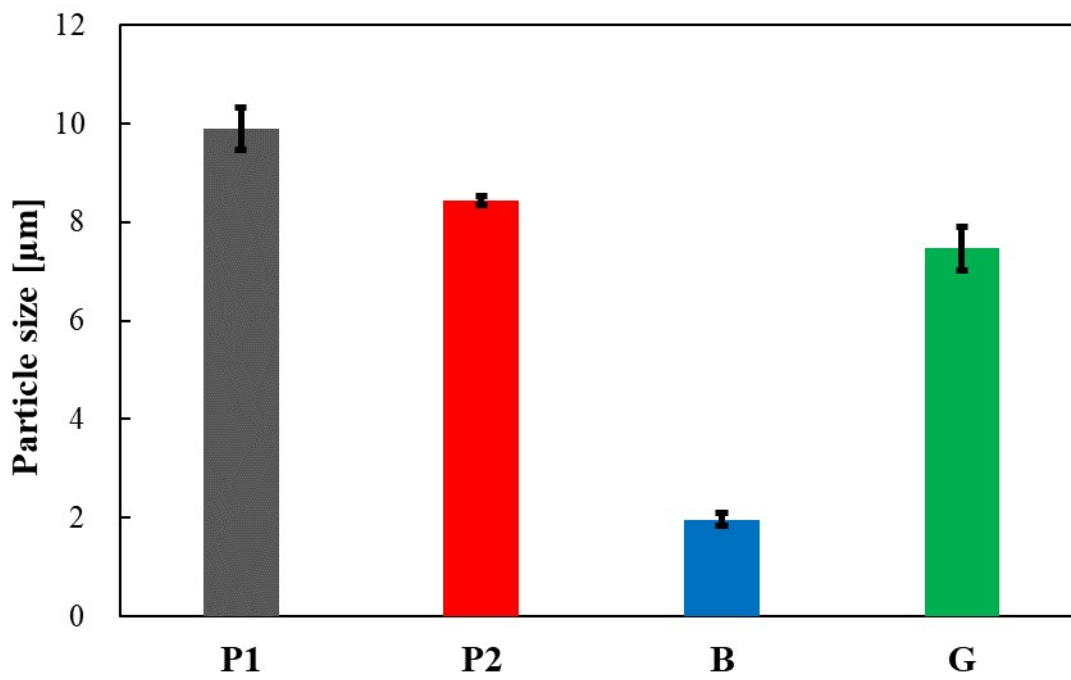

55

56 **Figure S3. Average size of particles deposited on the membrane surface during GDM**  
57 **filtration (n = 3).**

58

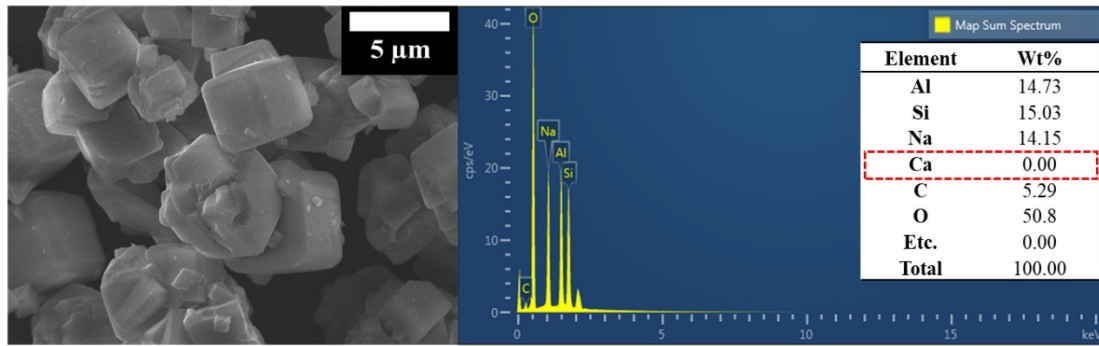

59  
60

(a)

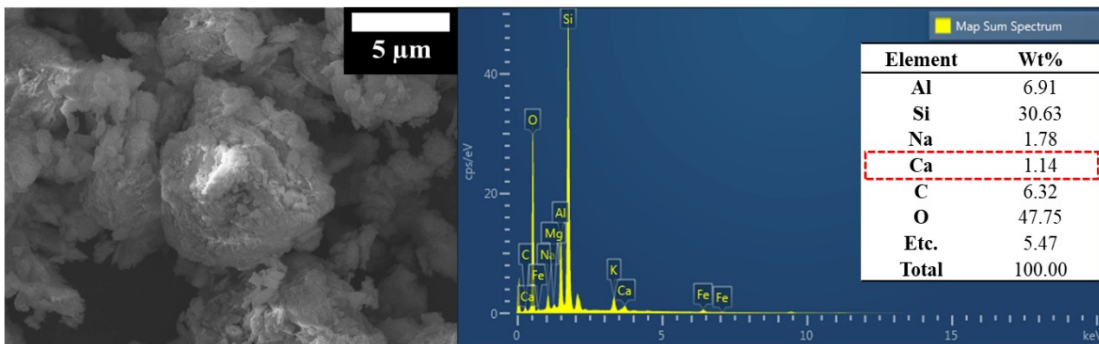

61  
62

(b)

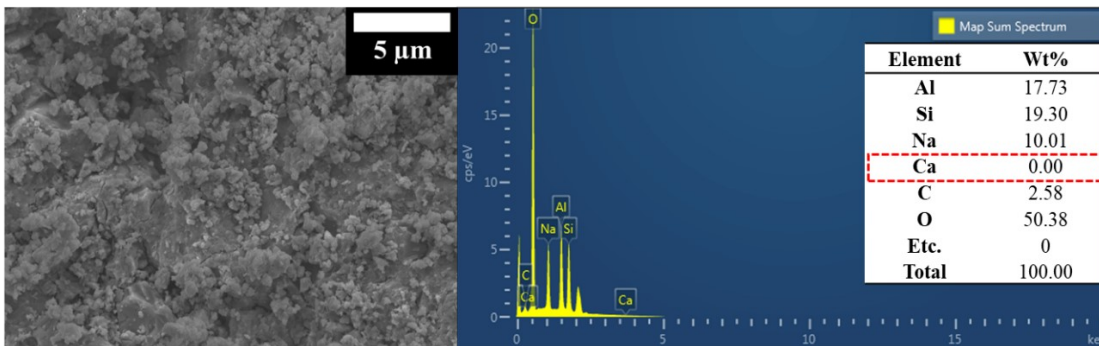

63  
64

(c)

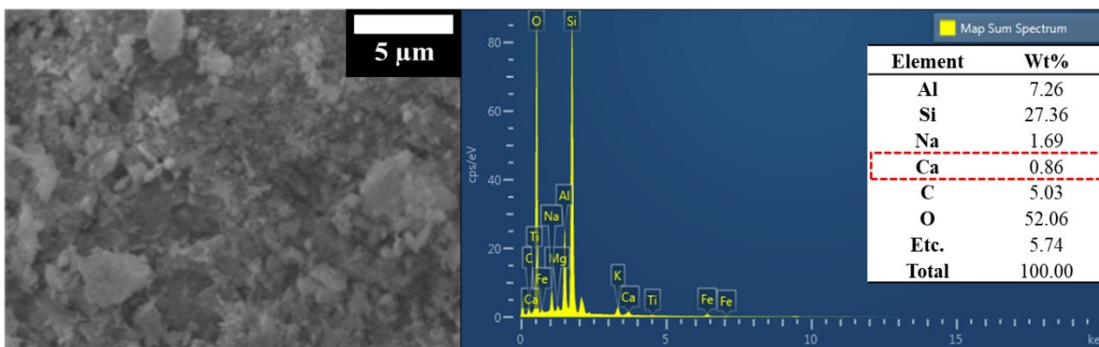

65  
66

(d)

67 **Figure S4. SEM-EDS data of zeolite (a) P1, (b) P2, (c) B, and (d) G.**

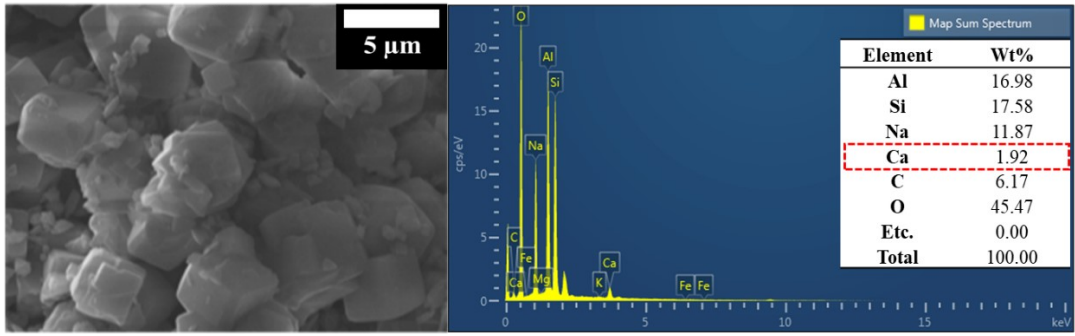

(a)

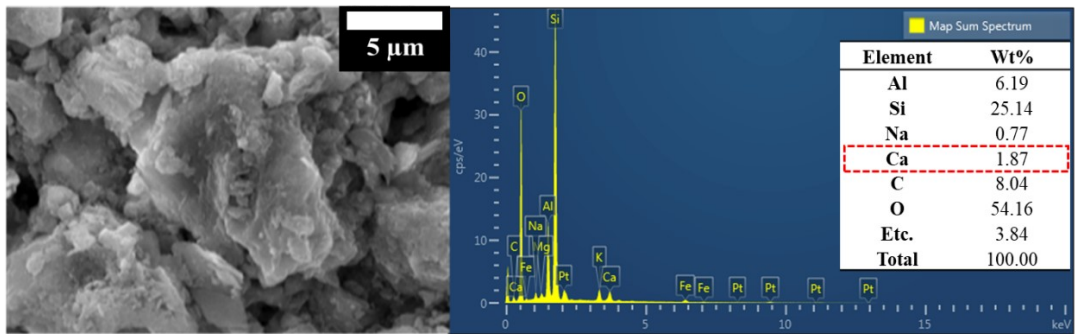

(b)

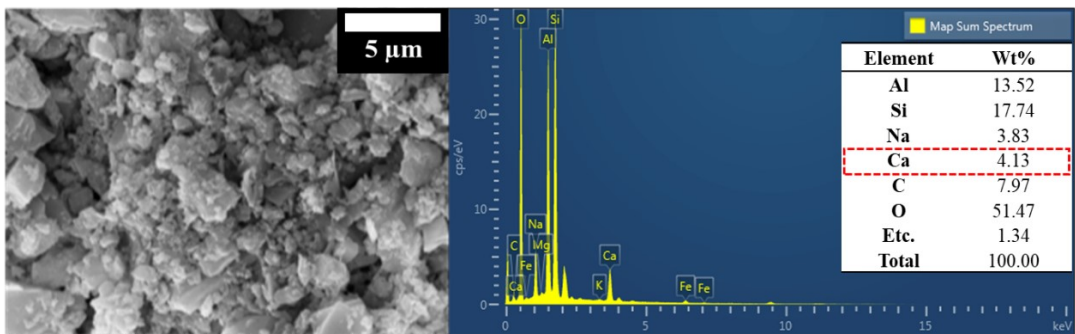

(c)

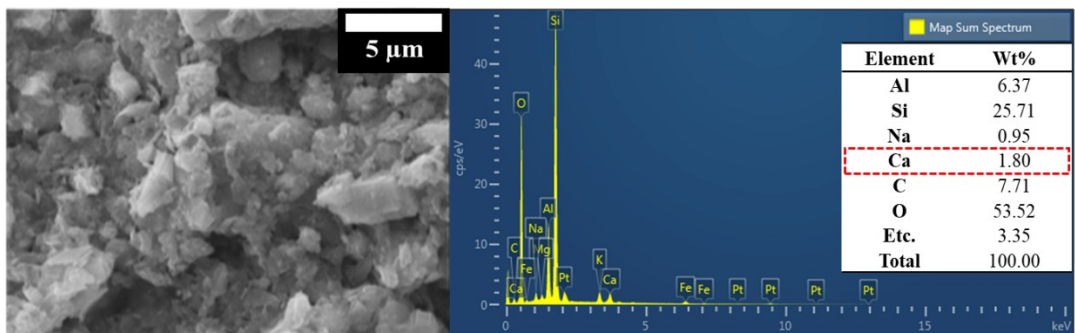

(d)

68  
69

70  
71

72  
73

74  
75

76 **Figure S5. SEM-EDS data of zeolite fouling cakes for (a) P1, (b) P2, (c) B, and (d) G**  
77 **accumulated on the membrane surface after GDM filtration.**

78
